# Supplementary material for: Exploration of severe early childhood caries microbiota through a novel developed nutrient enriched microbiological medium, high through-put 16S rRNA sequencing and culturomics
Source: PeerJ journal article supplement (doi:10.7717/peerj.18312), 2024-11-28
Supplement: Table_S1.docx [file Table_S1.docx]

| **Sample ID** | **Gender** | **Age(year)** | **dmfs*** |
| --- | --- | --- | --- |
| S-ECCI | Female | 4.03 | 17 |
| S-ECC2 | Female | 2.53 | 12 |
| S-ECC3 | Male | 4.04 | 20 |
| S-ECC4 | Female | 3.54 | 16 |
| S-ECC5 | Female | 3.02 | 9 |
| S-ECC6 | Male | 5.33 | 15 |
| S-ECC7 | Female | 5.16 | 16 |
| S-ECC8 | Male | 3.16 | 12 |
| S-ECC9 | Female | 2.66 | 10 |

dmfs*: decayed, missing, and filled tooth surface.
